# Supplementary material for: Discerning subtle high-pressure phase transitions in glyphosate
Source: Royal Society of Chemistry journal article supplement (doi:10.1039/d2ce01616h), 2023-01-01
Supplement: d2ce01616h1.pdf [file d2ce01616h1.pdf]

## SUPPLEMENTARY MATERIAL

### **Discerning Subtle High-Pressure Phase Transitions in Glyphosate.**

Cameron J. G. Wilson,<sup>a</sup> Peter A. Wood<sup>b</sup> and Simon Parsons<sup>a</sup>

<sup>a</sup> Centre for Science at Extreme Conditions, School of Chemistry, The University of Edinburgh, King's Buildings, West Mains Road, Edinburgh, UK.

<sup>b</sup> The Cambridge Crystallographic Data Centre, 12 Union Road, Cambridge, UK

## Contents

|                                               |    |
|-----------------------------------------------|----|
| Section A: Occupied volume calculations ..... | 3  |
| Section B: Supplementary Tables .....         | 5  |
| High pressure crystallography .....           | 5  |
| Strain Tensor Results .....                   | 8  |
| Section C: Supplementary figures .....        | 10 |

## Section A: Occupied volume calculations

$N$  randomly-generated points are placed in the unit cell (volume  $V$ ); those within the van der Waals radius of any atom are classified as lying in the space occupied by the network of atoms and their contacts, the remainder sample the void space. If there are  $N_{\text{net}}$  points within the network, an estimate of the network volume  $V_{\text{net}}$  is given by  $(N_{\text{net}}/N)V$ . The void volume is then  $V_{\text{void}} = V - V_{\text{net}}$ . This is implemented in the CellVol code.<sup>1</sup> The volume estimates converge as  $N$  increases, and in this work a value of  $N = 1$  million yielded a standard deviation of  $\leq 0.1\%$  of the network volume when the calculation was executed three times (Figure S1).

The uncertainties in the experimental structural parameters were propagated by repeating the above calculation using 50 structures in which the coordinates were perturbed with Gaussian random numbers taken from the distribution defined by each coordinate's standard uncertainty. The 50 calculations yield a distribution of  $V_{\text{net}}$  and  $V_{\text{void}}$  from which the standard uncertainties of each can be evaluated. Since precision is not defined for DFT-optimised structures, the standard uncertainty of  $V_{\text{net}}$  and  $V_{\text{void}}$  reflect only the reproducibility of each Monte Carlo run, typically, as indicated above,  $\leq 0.1\%$  of the network volume.

In an effort to identify which intermolecular interactions undergo the largest changes at the transitions, the volumes of the glyphosate molecule and each of the intermolecular dimers, A-H, were calculated by placing a box around them. The box is defined by producing a reference frame based on the three principal inertial axes of the molecules using the algorithm described by Gavezzotti.<sup>2</sup> The atomic coordinates of all the points within the molecules were used to construct an inertial matrix, ignoring atomic masses, and the eigenvalues of this matrix used to define the principal moments of inertia. The origin of our inertial reference frame is then taken as the centre of all atomic coordinates with the eigenvectors of the inertial matrix defining the rotation matrix between the original and inertial reference frame. By expressing the atomic coordinates within the inertial reference frame, the extreme points occupied by atoms of the molecule in each of the three inertial axes can then be located. These are used to define the box extended in all three dimensions beyond these values by a set length (2.5 Å in this work). When calculated for a single isolated molecule, the longest inertial axes is defined as the long axes of the molecule, used for discussions of the second transition within the main body of the text. The occupied volume

was then evaluated using a similar Monte Carlo procedure to that described above for unit cells.

The same procedure can be applied to dimers and clusters of molecules extracted from the crystal structure.

## Section B: Supplementary Tables

## High pressure crystallography: Crystal and refinement data

**Table S1:** Experimental parameters by high-pressure single-crystal measurements.

| Pressure /GPa                                                                                                                   | 0, DAC                               | 0.206                               | 0.302                                | 0.645                                | 0.934                                | 1.210                                | 1.609                                | 1.940                               |
|---------------------------------------------------------------------------------------------------------------------------------|--------------------------------------|-------------------------------------|--------------------------------------|--------------------------------------|--------------------------------------|--------------------------------------|--------------------------------------|-------------------------------------|
| Crystal data                                                                                                                    |                                      |                                     |                                      |                                      |                                      |                                      |                                      |                                     |
| Temperature (K)                                                                                                                 | 293                                  | 293                                 | 293                                  | 293                                  | 293                                  | 293                                  | 293                                  | 293                                 |
| Spacegroup                                                                                                                      | P2 <sub>1</sub> /c                   | P2 <sub>1</sub> /c                  | P2 <sub>1</sub> /c                   | P2 <sub>1</sub> /c                   | P2 <sub>1</sub> /c                   | P2 <sub>1</sub> /c                   | P2 <sub>1</sub> /c                   | P2 <sub>1</sub> /c                  |
| <i>a</i> , <i>b</i> , <i>c</i> (Å)                                                                                              | 8.6693(13)<br>7.9704(6)<br>9.8968(7) | 8.6720(6)<br>7.9508(3)<br>9.8213(3) | 8.6626(10)<br>7.9208(4)<br>9.7820(5) | 8.6567(16)<br>7.8828(7)<br>9.7114(9) | 8.6512(13)<br>7.8496(6)<br>9.6513(8) | 8.6419(10)<br>7.8197(4)<br>9.6036(6) | 8.6334(14)<br>7.7827(7)<br>9.5468(9) | 8.6285(9)<br>7.7531(4)<br>9.4944(5) |
| $\beta$ (°)                                                                                                                     | 105.644(9)                           | 106.235(4)                          | 106.599(7)                           | 107.244(11)                          | 107.785(9)                           | 108.174(7)                           | 108.729(10)                          | 109.104(5)                          |
| <i>V</i> (Å <sup>3</sup> )                                                                                                      | 658.51(12)                           | 650.17(6)                           | 643.22(9)                            | 632.91(15)                           | 624.08(12)                           | 616.61(9)                            | 607.49(13)                           | 600.17(8)                           |
| <i>Z</i>                                                                                                                        | 4                                    | 4                                   | 4                                    | 4                                    | 4                                    | 4                                    | 4                                    | 4                                   |
| $\mu$ (mm <sup>-1</sup> )                                                                                                       | 0.203                                | 0.206                               | 0.208                                | 0.211                                | 0.214                                | 0.217                                | 0.220                                | 0.223                               |
| Crystal size (mm)                                                                                                               | 0.15 ×<br>0.135 ×<br>0.05            | 0.19 ×<br>0.17 ×<br>0.05            | 0.15 ×<br>0.135 ×<br>0.05            | 0.19 ×<br>0.17 ×<br>0.05            |
| Data Collection                                                                                                                 |                                      |                                     |                                      |                                      |                                      |                                      |                                      |                                     |
| Wavelength (Å)                                                                                                                  | 0.56086                              | 0.56086                             | 0.56086                              | 0.56086                              | 0.56086                              | 0.56086                              | 0.56086                              | 0.56086                             |
| Absorption correction ( <i>wR</i> <sup>2</sup> <sub>bef</sub> , <i>wR</i> <sup>2</sup> <sub>aft</sub> , max : min transmission) | 0.0895,<br>0.0623,<br>0.6587         | 0.0581,<br>0.0477,<br>0.8968        | 0.0856,<br>0.0589,<br>0.6493         | 0.0912,<br>0.0666,<br>0.7006         | 0.0833,<br>0.0627,<br>0.7371         | 0.0884,<br>0.0645,<br>0.6571         | 0.0855,<br>0.0635,<br>0.7825         | 0.0589,<br>0.0464,<br>0.8885        |
| <i>T</i> <sub>min</sub> , <i>T</i> <sub>max</sub>                                                                               | 0.4904,<br>0.7445                    | 0.6677,<br>0.7445                   | 0.4834,<br>0.7445                    | 0.5216,<br>0.7445                    | 0.5488,<br>0.7445                    | 0.4892,<br>0.7445                    | 0.5826,<br>0.7445                    | 0.6615,<br>0.7445                   |
| Measured, independent and observed reflections                                                                                  | 3682, 517,<br>365                    | 5852, 511,<br>435                   | 5682, 517,<br>376                    | 5611, 506,<br>375                    | 5430, 490,<br>383                    | 5409, 494,<br>382                    | 5243, 471,<br>373                    | 5320, 468,<br>416                   |
| <i>R</i> <sub>int</sub><br>( <i>sin</i> $\theta$ / $\lambda$ ) <sub>max</sub> (Å <sup>-1</sup> )                                | 0.0762<br>0.625                      | 0.0422<br>0.627                     | 0.0703<br>0.625                      | 0.0783<br>0.625                      | 0.0738<br>0.625                      | 0.0724<br>0.627                      | 0.0762<br>0.625                      | 0.0363<br>0.626                     |
| Refinement                                                                                                                      |                                      |                                     |                                      |                                      |                                      |                                      |                                      |                                     |
| <i>R</i> [ <i>F</i> <sup>2</sup> > 2 $\sigma$ ( <i>F</i> <sup>2</sup> )], <i>wR</i> ( <i>F</i> <sup>2</sup> ), <i>S</i>         | 0.0413,<br>0.1108,<br>1.069          | 0.0253,<br>0.0642,<br>1.071         | 0.0369,<br>0.1008,<br>1.052          | 0.0352,<br>0.0937,<br>1.097          | 0.0375,<br>0.0820,<br>1.052          | 0.0365,<br>0.0946,<br>1.042          | 0.0298,<br>0.0720,<br>1.067          | 0.0236,<br>0.0622,<br>1.103         |
| Data completeness                                                                                                               | 0.394                                | 0.391                               | 0.404                                | 0.400                                | 0.395                                | 0.399                                | 0.391                                | 0.393                               |
| No. of reflections                                                                                                              | 517                                  | 511                                 | 517                                  | 506                                  | 490                                  | 494                                  | 471                                  | 468                                 |
| No. of parameters                                                                                                               | 93                                   | 93                                  | 93                                   | 93                                   | 94                                   | 93                                   | 93                                   | 93                                  |
| No. of restraints                                                                                                               | 82                                   | 82                                  | 82                                   | 82                                   | 82                                   | 82                                   | 82                                   | 82                                  |
| $\Delta\rho$ <sub>max</sub> , $\Delta\rho$ <sub>min</sub> (e Å <sup>-3</sup> )                                                  | 0.216, -<br>0.242                    | 0.103, -<br>0.144                   | 0.208, -<br>0.283                    | 0.214, -<br>0.238                    | 0.165, -<br>0.168                    | 0.189, -<br>0.212                    | 0.134, -<br>0.132                    | 0.120, -<br>0.138                   |

| Pressure /GPa                                                                               | 2.244                        | 2.410                        | 3.117                        | 3.630                        | 3.783                        | 4.228                        | 4.813                        | 5.176                        |
|---------------------------------------------------------------------------------------------|------------------------------|------------------------------|------------------------------|------------------------------|------------------------------|------------------------------|------------------------------|------------------------------|
| Crystal data                                                                                |                              |                              |                              |                              |                              |                              |                              |                              |
| Temperature (K)                                                                             | 293                          | 293                          | 293                          | 293                          | 293                          | 293                          | 293                          | 293                          |
| Spacegroup                                                                                  | P2 <sub>1</sub> /c           |
| $a, b, c$ (Å)                                                                               | 8.6185(7)<br>7.7238(3)       | 8.616(5)<br>7.706(2)         | 8.5889(9)<br>7.6517(4)       | 8.5740(13)<br>7.6158(5)      | 8.562(2)<br>7.6058(9)        | 8.5435(9)<br>7.5706(4)       | 8.526(2)<br>7.5312(9)        | 8.496(5)<br>7.510(2)         |
| $\beta$ (°)                                                                                 | 9.4573(4)                    | 9.438(3)                     | 9.3709(5)                    | 9.3347(7)                    | 9.3306(12)                   | 9.2993(5)                    | 9.2654(12)                   | 9.249(3)                     |
| $V$ (Å <sup>3</sup> )                                                                       | 109.454(4)                   | 109.78(3)                    | 110.256(5)                   | 110.657(7)                   | 110.868(13)                  | 111.200(6)                   | 111.625(13)                  | 111.96(3)                    |
| $Z$                                                                                         | 593.61(6)                    | 589.6(4)                     | 577.77(8)                    | 570.35(11)                   | 567.79(18)                   | 560.77(8)                    | 553.06(17)                   | 547.3(4)                     |
| $\mu$ (mm <sup>-1</sup> )                                                                   | 4                            | 4                            | 4                            | 4                            | 4                            | 4                            | 4                            | 4                            |
| Crystal size (mm)                                                                           | 0.225                        | 0.227                        | 0.231                        | 0.234                        | 0.235                        | 0.238                        | 0.242                        | 0.244                        |
|                                                                                             | 0.19 ×<br>0.17 ×<br>0.05     | 0.15 ×<br>0.135 ×<br>0.05    | 0.19 ×<br>0.17 ×<br>0.05     | 0.19 ×<br>0.17 ×<br>0.05     | 0.15 ×<br>0.135 ×<br>0.05    | 0.15 ×<br>0.135 ×<br>0.05    | 0.15 ×<br>0.135 ×<br>0.05    | 0.15 ×<br>0.135 ×<br>0.05    |
| Data Collection                                                                             |                              |                              |                              |                              |                              |                              |                              |                              |
| Wavelength (Å)                                                                              | 0.56086                      | 0.56086                      | 0.56086                      | 0.56086                      | 0.56086                      | 0.56086                      | 0.56086                      | 0.56086                      |
| Absorption correction ( $wR^2_{\text{bef}}$ , $wR^2_{\text{aft}}$ , max : min transmission) | 0.0580,<br>0.0473,<br>0.8547 | 0.0823,<br>0.0662,<br>0.7907 | 0.0562,<br>0.0466,<br>0.8880 | 0.0759,<br>0.0600,<br>0.7511 | 0.0830,<br>0.0617,<br>0.8156 | 0.0732,<br>0.0614,<br>0.8109 | 0.0679,<br>0.0568,<br>0.8423 | 0.0697,<br>0.0560,<br>0.8176 |
| $T_{\text{min}}, T_{\text{max}}$                                                            | 0.6363,<br>0.7445            | 0.5887,<br>0.7445            | 0.6611,<br>0.7445            | 0.5592,<br>0.7445            | 0.6072,<br>0.7445            | 0.6037,<br>0.7445            | 0.6271,<br>0.7445            | 0.6087,<br>0.7445            |
| Measured, independent and observed reflections                                              | 5389, 468,<br>411            | 4649,<br>479, 376            | 5234, 466,<br>418            | 5032, 446,<br>399            | 4804, 532,<br>408            | 4847, 527,<br>412            | 4936, 526,<br>420            | 4692,<br>551, 426            |
| $R_{\text{int}}$<br>( $\sin \theta/\lambda$ ) <sub>max</sub> (Å <sup>-1</sup> )             | 0.0378<br>0.627              | 0.0740<br>0.625              | 0.0371<br>0.627              | 0.0502<br>0.626              | 0.0726<br>0.630              | 0.0701<br>0.625              | 0.0619<br>0.625              | 0.0587<br>0.625              |
| Refinement                                                                                  |                              |                              |                              |                              |                              |                              |                              |                              |
| $R[F^2 > 2\sigma(F^2)]$ , $wR(F^2)$ , $S$                                                   | 0.0242,<br>0.0658,<br>1.097  | 0.0348,<br>0.0760,<br>1.038  | 0.0236,<br>0.0624,<br>1.093  | 0.0262,<br>0.0659,<br>1.141  | 0.0397,<br>0.0920,<br>1.045  | 0.0366,<br>0.0883,<br>1.092  | 0.0333,<br>0.0797,<br>1.106  | 0.0377,<br>0.0985,<br>1.139  |
| Data completeness                                                                           | 0.390                        | 0.402                        | 0.397                        | 0.388                        | 0.464                        | 0.467                        | 0.471                        | 0.497                        |
| No. of reflections                                                                          | 468                          | 479                          | 466                          | 446                          | 532                          | 527                          | 526                          | 551                          |
| No. of parameters                                                                           | 93                           | 93                           | 93                           | 93                           | 93                           | 93                           | 93                           | 93                           |
| No. of restraints                                                                           | 82                           | 82                           | 82                           | 82                           | 82                           | 82                           | 82                           | 82                           |
| $\Delta\rho_{\text{max}}, \Delta\rho_{\text{min}}$ (e Å <sup>-3</sup> )                     | 0.111, -<br>0.144            | 0.188, -<br>0.188            | 0.127, -<br>0.137            | 0.117, -<br>0.139            | 0.208, -<br>0.250            | 0.202, -<br>0.234            | 0.206, -<br>0.274            | 0.222, -<br>0.279            |

|                                                                                                |                                     |
|------------------------------------------------------------------------------------------------|-------------------------------------|
| Pressure /GPa                                                                                  | 0, fibre                            |
| Crystal data                                                                                   |                                     |
| Temperature (K)                                                                                | 270                                 |
| Spacegroup                                                                                     | P2 <sub>1</sub> /c                  |
| $a, b, c$ (Å)                                                                                  | 8.6764(5)<br>7.9722(5)<br>9.8883(6) |
| $\beta$ (°)                                                                                    | 105.691(2)                          |
| $V$ (Å <sup>3</sup> )                                                                          | 658.48(7)                           |
| $Z$                                                                                            | 4                                   |
| $\mu$ (mm <sup>-1</sup> )                                                                      | 0.384                               |
| Crystal size (mm)                                                                              | 0.15 ×<br>0.135 ×<br>0.05           |
| Data Collection                                                                                |                                     |
| Wavelength (Å)                                                                                 | 0.71073                             |
| Absorption correction ( $wR^2_{\text{bef}}$ ,<br>$wR^2_{\text{aft}}$ , max : min transmission) | 0.0923,<br>0.0443,<br>0.9144        |
| $T_{\text{min}}, T_{\text{max}}$                                                               | 0.6822,<br>0.7461                   |
| Measured, independent and observed reflections                                                 | 12666,<br>1981,<br>1747             |
| $R_{\text{int}}$                                                                               | 0.0318                              |
| $(\sin \theta/\lambda)_{\text{max}}$ (Å <sup>-1</sup> )                                        | 0.715                               |
| Refinement                                                                                     |                                     |
| $R[F^2 > 2\sigma(F^2)], wR(F^2), S$                                                            | 0.0285,<br>0.0805,<br>1.112         |
| Data completeness                                                                              | 0.982                               |
| No. of reflections                                                                             | 1981                                |
| No. of parameters                                                                              | 93                                  |
| No. of restraints                                                                              | 0                                   |
| $\Delta\rho_{\text{max}}, \Delta\rho_{\text{min}}$ (e Å <sup>-3</sup> )                        | 0.419, -<br>0.324                   |

## Strain Tensor Results

The Strain tensor was calculated as described in ref.<sup>3</sup> Eigenvalues and vectors were calculated using JACOBI from ref.<sup>4</sup> Results at each pressure are represented below in Table S2. Table S3 features these results scaled by GPa which are plotted in Figure S4. Glyphosate shows remarkably 2D compression with strain axes 1 barely varying from zero. After a minor increase, this strain axes decreases indicating minor negative linear compressibility.

**Table S2:** Calculated strain axes in glyphosate.

| Pressure /GPa | 1        | 2        | 3        | a     | b     | c     | $\alpha$ | $\beta$ | $\gamma$ |
|---------------|----------|----------|----------|-------|-------|-------|----------|---------|----------|
| 0             | 0        | 0        | 0        | 8.669 | 7.97  | 9.897 | 90       | 105.644 | 90       |
| 0.206         | 0.001613 | -0.00246 | -0.01187 | 8.672 | 7.951 | 9.821 | 90       | 106.235 | 90       |
| 0.302         | 0.001687 | -0.00622 | -0.01886 | 8.663 | 7.921 | 9.782 | 90       | 106.599 | 90       |
| 0.645         | 0.002734 | -0.01099 | -0.03112 | 8.657 | 7.883 | 9.711 | 90       | 107.244 | 90       |
| 0.934         | 0.003467 | -0.01516 | -0.0415  | 8.651 | 7.85  | 9.651 | 90       | 107.785 | 90       |
| 1.21          | 0.003363 | -0.01891 | -0.04944 | 8.642 | 7.82  | 9.604 | 90       | 108.174 | 90       |
| 1.609         | 0.003856 | -0.02355 | -0.05981 | 8.633 | 7.783 | 9.547 | 90       | 108.729 | 90       |
| 1.94          | 0.003874 | -0.02726 | -0.06788 | 8.628 | 7.753 | 9.494 | 90       | 109.104 | 90       |
| 2.244         | 0.003668 | -0.03094 | -0.07463 | 8.618 | 7.724 | 9.457 | 90       | 109.454 | 90       |
| 2.41          | 0.004416 | -0.03319 | -0.07967 | 8.616 | 7.706 | 9.438 | 90       | 109.782 | 90       |
| 3.117         | 0.002475 | -0.03999 | -0.0904  | 8.589 | 7.652 | 9.371 | 90       | 110.256 | 90       |
| 3.63          | 0.00201  | -0.04449 | -0.09778 | 8.574 | 7.616 | 9.335 | 90       | 110.657 | 90       |
| 3.783         | 0.001865 | -0.04574 | -0.10068 | 8.562 | 7.606 | 9.331 | 90       | 110.868 | 90       |
| 4.228         | 0.000852 | -0.05016 | -0.10708 | 8.543 | 7.571 | 9.299 | 90       | 111.2   | 90       |
| 4.813         | 0.000292 | -0.0551  | -0.11468 | 8.526 | 7.531 | 9.265 | 90       | 111.625 | 90       |
| 5.176         | -0.00119 | -0.05781 | -0.12043 | 8.496 | 7.51  | 9.249 | 90       | 111.961 | 90       |



**Table S3:** Calculated strain axes scaled by GPa.

| Pressure /GPa | 1        | 2        | 3        | a     | b     | c     | $\alpha$ | $\beta$ | $\gamma$ |
|---------------|----------|----------|----------|-------|-------|-------|----------|---------|----------|
| 0             | 0        | 0        | 0        | 8.669 | 7.97  | 9.897 | 90       | 105.644 | 90       |
| 0.206         | 0.007829 | -0.01194 | -0.05763 | 8.672 | 7.951 | 9.821 | 90       | 106.235 | 90       |
| 0.302         | 0.005587 | -0.02061 | -0.06246 | 8.663 | 7.921 | 9.782 | 90       | 106.599 | 90       |
| 0.645         | 0.004239 | -0.01704 | -0.04825 | 8.657 | 7.883 | 9.711 | 90       | 107.244 | 90       |
| 0.934         | 0.003712 | -0.01623 | -0.04443 | 8.651 | 7.85  | 9.651 | 90       | 107.785 | 90       |
| 1.21          | 0.002779 | -0.01563 | -0.04086 | 8.642 | 7.82  | 9.604 | 90       | 108.174 | 90       |
| 1.609         | 0.002396 | -0.01464 | -0.03717 | 8.633 | 7.783 | 9.547 | 90       | 108.729 | 90       |
| 1.94          | 0.001997 | -0.01405 | -0.03499 | 8.628 | 7.753 | 9.494 | 90       | 109.104 | 90       |
| 2.244         | 0.001635 | -0.01379 | -0.03326 | 8.618 | 7.724 | 9.457 | 90       | 109.454 | 90       |
| 2.41          | 0.001832 | -0.01377 | -0.03306 | 8.616 | 7.706 | 9.438 | 90       | 109.782 | 90       |
| 3.117         | 0.000794 | -0.01283 | -0.029   | 8.589 | 7.652 | 9.371 | 90       | 110.256 | 90       |
| 3.63          | 0.000554 | -0.01226 | -0.02694 | 8.574 | 7.616 | 9.335 | 90       | 110.657 | 90       |
| 3.783         | 0.000493 | -0.01209 | -0.02661 | 8.562 | 7.606 | 9.331 | 90       | 110.868 | 90       |
| 4.228         | 0.000201 | -0.01186 | -0.02533 | 8.543 | 7.571 | 9.299 | 90       | 111.2   | 90       |
| 4.813         | 0.000061 | -0.01145 | -0.02383 | 8.526 | 7.531 | 9.265 | 90       | 111.625 | 90       |
| 5.176         | -0.00023 | -0.01117 | -0.02327 | 8.496 | 7.51  | 9.249 | 90       | 111.961 | 90       |

## Section C: Supplementary figures

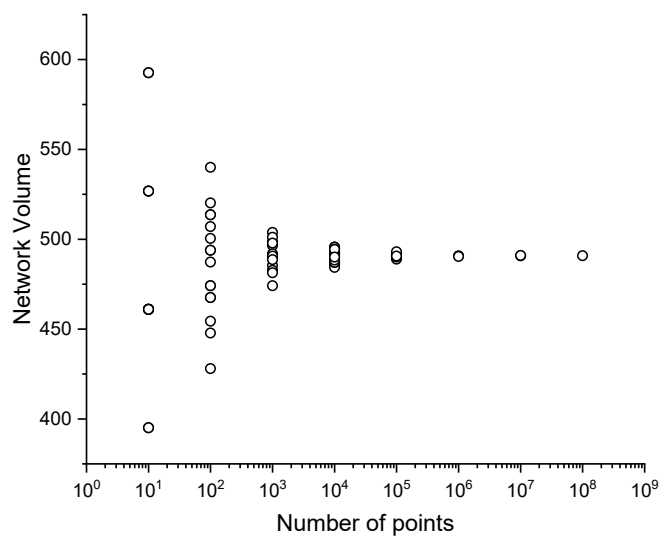

**Figure S1:** Convergence of points per CellVol calculation

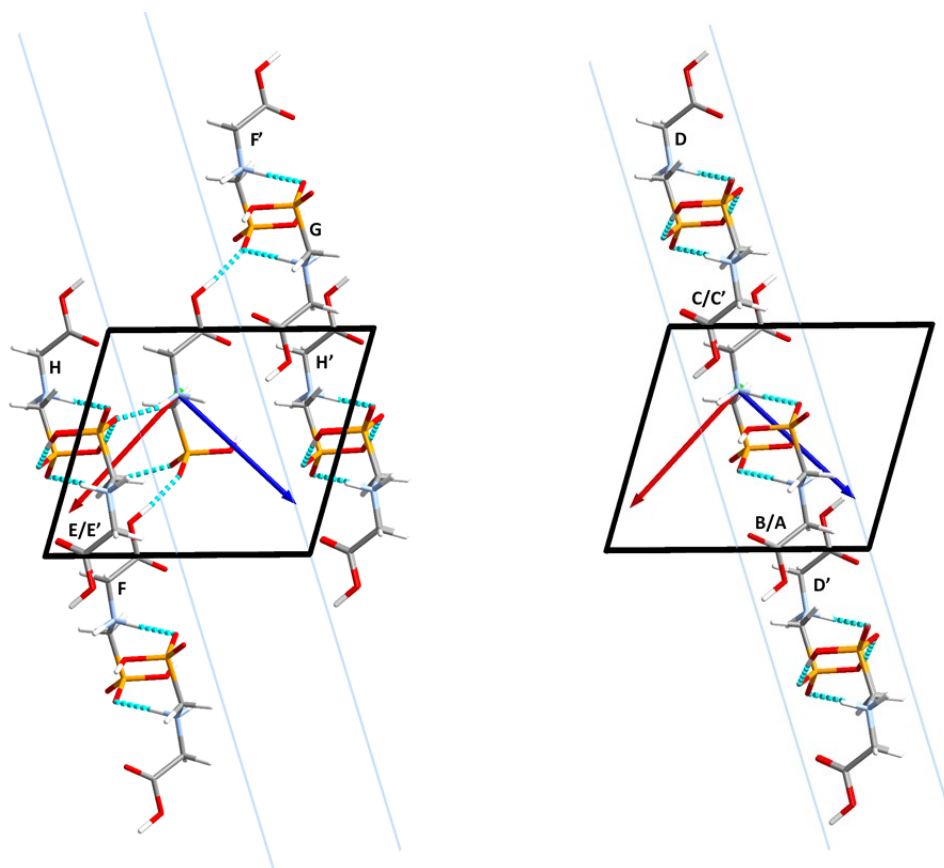

**Figure S2:** Contacts which make up the inter (left) and intra (right) volumes presented in the main body of the paper. Note that labels refer to molecule - molecule interactions, as listed in Table 1 of the main text, rather than individual contacts such as H-bonds.

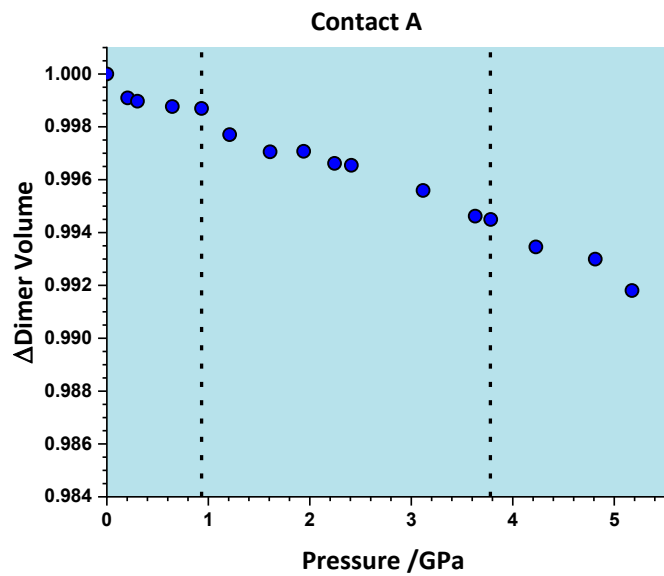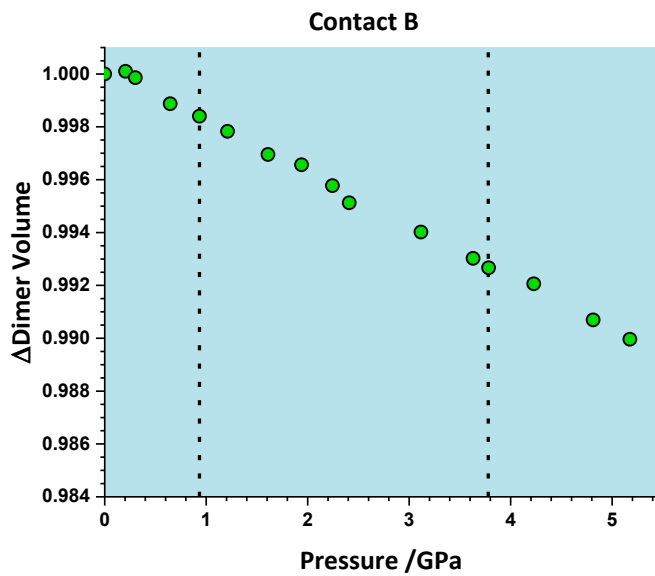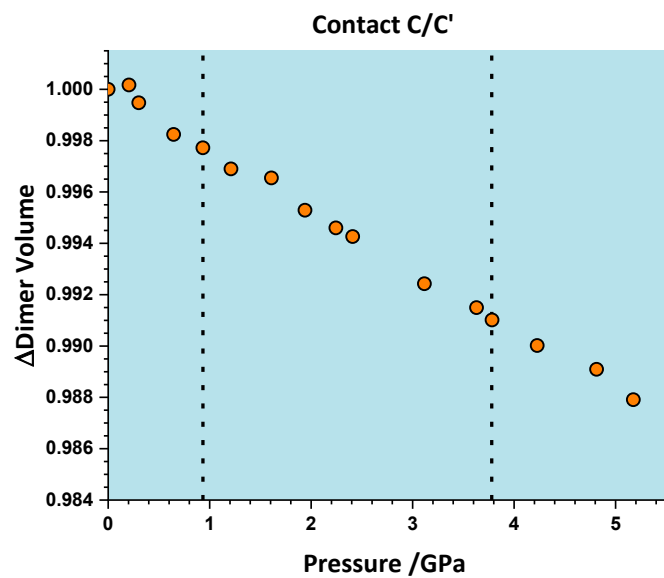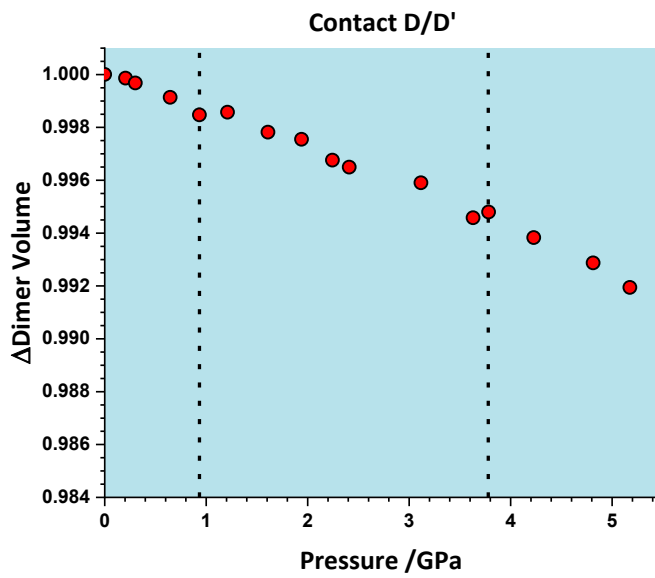

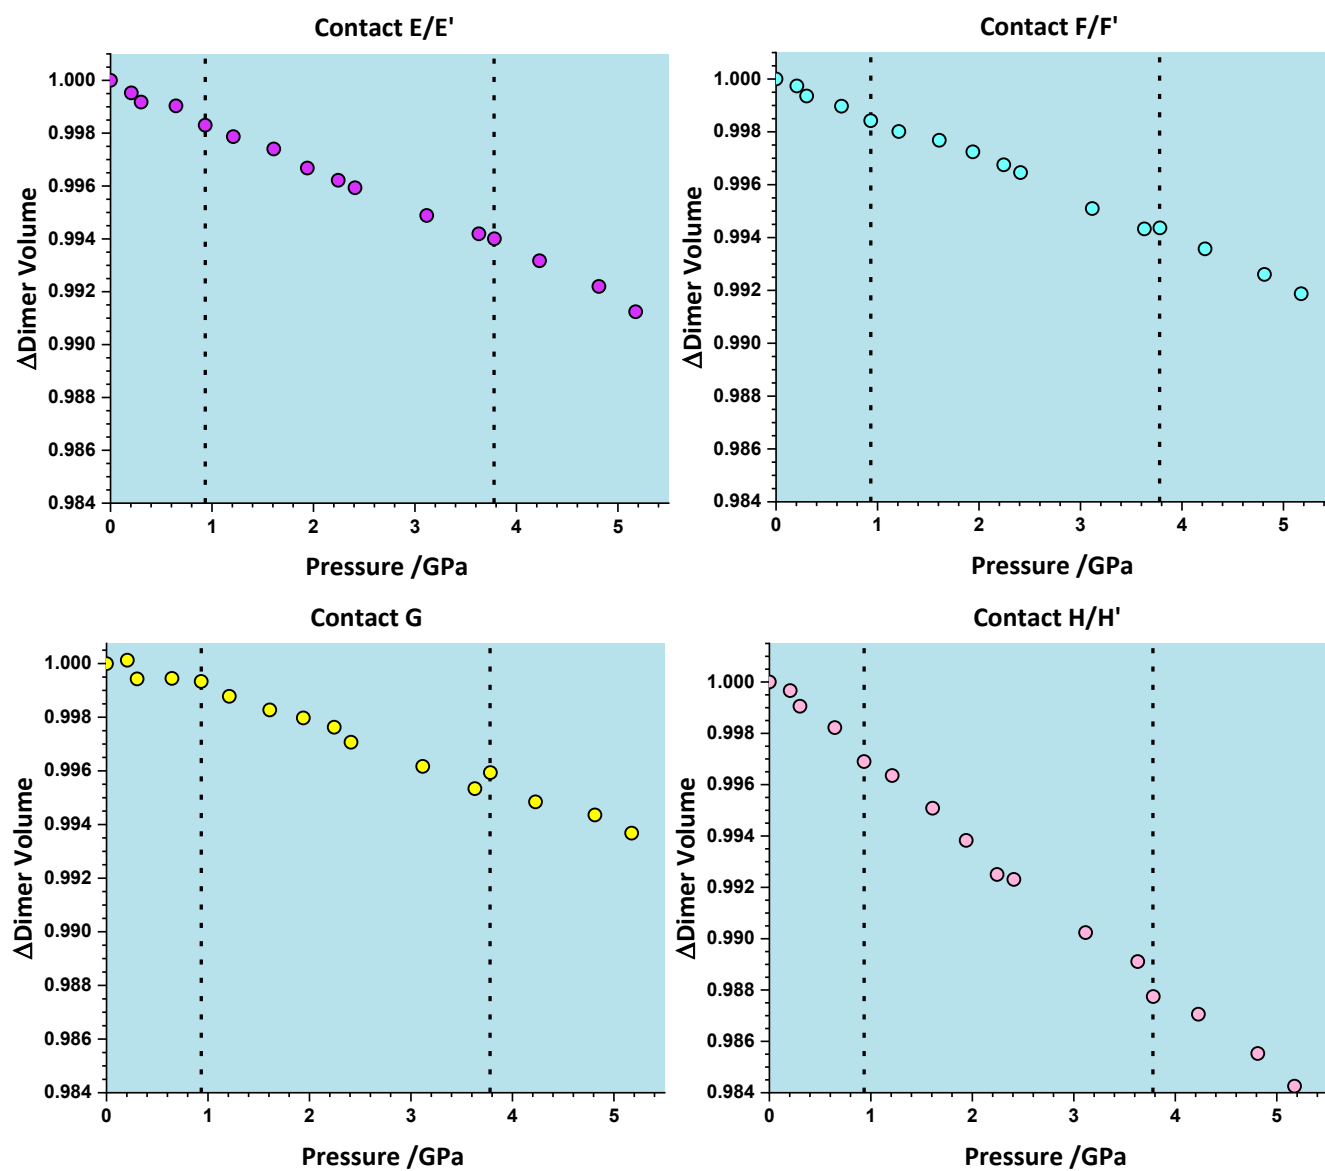

**Figure S3:** Molecular volume in each contact listed in Table 1 of the main text. A consistent set of vertical axes is used across all contacts to aid comparison.

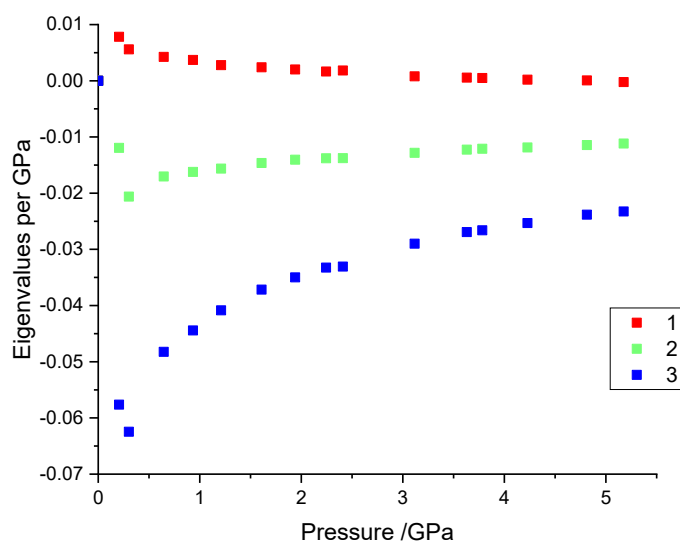

**Figure S4:** Eigenvalues of the strain tensor per GPa as a function of pressure.

1. C. J. G. Wilson, T. Cervenka, P. A. Wood and S. Parsons, *Cryst. Growth Des.*, 2022, **22**, 2328-2341.
2. A. Gavezzotti, *Molecular Aggregation*, Oxford University Press: Oxford, UK, 2007.
3. R. M. Hazen, Finger, L. W., *Comparative Crystal Chemistry*, John Wiley & Sons, 1982.
4. W. H. Press, B. P. Flannery, S. A. Teukolsky and W. T. Vetterling, *Numerical recipes in fortran: The art of scientific computing*, Cambridge University Press, Cambridge, UK, 2 edn., 1992.
